# Supplementary material for: Psychiatric symptoms of frontotemporal dementia and subcortical (co-)pathology burden: new insights
Source: PubMed Central journal article supplement — Brain. 2022 Feb 8;146(1):307–20. doi: 10.1093/brain/awac043 (PMC9825544; doi:10.1093/brain/awac043), 2022-02-08
Supplement: awac043_supplementary_data.pdf [file awac043_supplementary_data.pdf]

## **Supplementary Methods 1 - Definitions and methods used for the scoring of clinical features**

For the scoring of clinical features, only the clinical records concerning the first three years from disease onset were taken into account. To be scored as “present”, the symptoms must not have been the result of substance abuse, administered drugs or another medical condition.

### **1. Depression (0-1) <sup>1</sup>**

The feature “depression” was given a score of “1” if a clinical episode of depression was explicitly mentioned in the clinical records and/or if the overall description of an episode lasting at least 2 weeks included at least two items from the following list:

- Depressed mood most of the time
- Markedly diminished interest or pleasure in activities most of the time
- Significant weight loss or weight gain (not better explained by another medical condition), or decrease/increase in appetite
- Constant fatigue or loss of energy most of the time
- Feelings of worthlessness and/or guilt most of the time
- Thoughts of death, suicidal ideation or a suicide attempt

### **2. Mania (0-1) <sup>1</sup>**

The feature “mania” was given a score of “1” if a clinical episode of mania/hypomania and/or a diagnosis of “bipolar disorder” was explicitly mentioned in the clinical records.

### **3. Hallucinations (0-1) <sup>1,2</sup>**

The feature “hallucinations” was given a score of “1” if a clinical episode of hallucinations was explicitly mentioned in the clinical records and/or an episode was mentioned consisting of a false perception, namely a perception in the absence of an external stimulus that is experienced as real. Hallucinations in all sensory modalities were taken into account, as well as both elementary and complex hallucinations.

### **4. Delusions (0-1) <sup>1,2</sup>**

The feature “delusions” was given a score of “1” if a clinical episode of delusions was explicitly mentioned in the clinical records and/or an episode was mentioned consisting of false beliefs, namely beliefs based on wrong assumptions about external reality that persist despite contrary evidence.

### **5. Disinhibition (0-3) <sup>3</sup>**

The following “disinhibition” subcategories were given a score “1” if mentioned, “0” if not mentioned. The single scores were summed and the total score was used.

- Socially inappropriate behavior
- Loss of manners or decorum
- Impulsive, rash or careless actions

**6. Apathy\inertia (0-2)**<sup>3</sup>

The following “apathy/inertia” subcategories were given a score “1” if mentioned, “0” if not mentioned. The single scores were summed and the total score was used.

- Apathy
- Inertia

**7. Perseverative\compulsive behavior (0-3)**<sup>3</sup>

The following “perseverative\compulsive behaviour” subcategories were given a score “1” if mentioned, “0” if not mentioned. The single scores were summed and the total score was used.

- Simple repetitive movements
- Complex, compulsive or ritualistic behaviors
- Stereotypy of speech

**8. Hyperorality (0-3)**<sup>3</sup>

The following “hyperorality” subcategories were given a score “1” if mentioned, “0” if not mentioned. The single scores were summed and the total score was used.

- Altered food preferences
- Binge eating, increased consumption of alcohol or cigarettes
- Oral exploration or consumption of inedible objects

### Supplementary Fig. 1 – Pathology scores

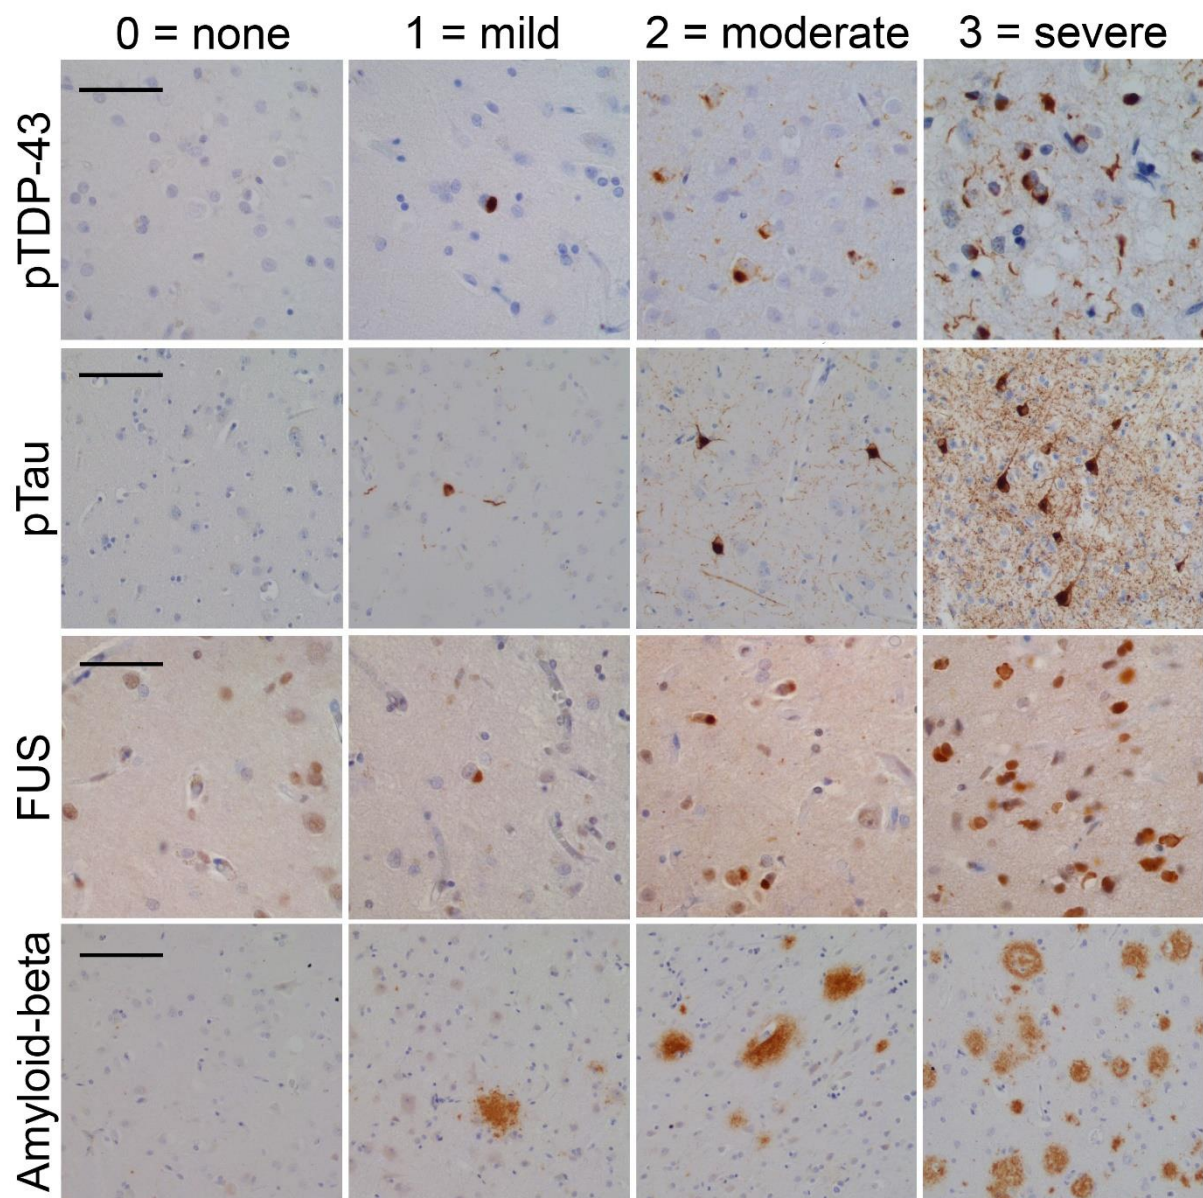

pTDP-43. The presence of pTDP-43 immunoreactive structures, namely neuronal cytoplasmic inclusions (NCI) and threads, was scored as follows at magnification x200: 0, absent; 1, mild (0-5 NCI or long threads, 0-10 small threads); 2, moderate (6-15 NCI or long threads, 11-25 small threads); 3, severe (>15 NCI or long threads, >25 small threads).<sup>4</sup> Scale bar = 50  $\mu$ m.

pTau. The presence of pTau immunoreactive structures, at magnifications x100 and x200, was scored as follows: 0, absent; 1, mild (immunoreactivity barely noted at low magnification); 2, moderate (immunoreactivity easily seen at both magnifications); 3, severe (immunoreactivity seen even without the microscope).<sup>5</sup> Scale bar = 100  $\mu$ m.

FUS. The presence of FUS immunoreactive structures, namely NCI or vermiform neuronal intranuclear inclusions (VNII), was scored as follows at magnification x200: 0, absent; 1, mild (<5 NCI or VNII); 2, moderate (6-15 NCI or VNII); 3, severe (>15 NCI or VNII). Scale bar = 50  $\mu\text{m}$ .

Amyloid-beta. The presence of amyloid-beta ( $A\beta$ ) plaques, at magnification x100, was scored as follows: 0, absent; 1, mild (1-5 plaques); 2, moderate (6-20 plaques); 3, severe (>20 plaques).<sup>6</sup> Scale bar = 100  $\mu\text{m}$ .

## Supplementary References

1. American Psychiatric Association. *Diagnostic and statistical manual of mental disorders*. 5th ed. Washington DC: American Psychiatric Publishing; 2013.
2. Arciniegas DB. Psychosis. *Continuum (Minneapolis, Minn)*. 2015;21(3 Behavioral Neurology and Neuropsychiatry):715-736.
3. Rascovsky K, Hodges JR, Knopman D, et al. Sensitivity of revised diagnostic criteria for the behavioural variant of frontotemporal dementia. *Brain*. 2011;134(Pt 9):2456-2477.
4. Fatima M, Tan R, Halliday GM, Kril JJ. Spread of pathology in amyotrophic lateral sclerosis: assessment of phosphorylated TDP-43 along axonal pathways. *Acta Neuropathol Commun*. 2015;3:47.
5. Alafuzoff I, Arzberger T, Al-Sarraj S, et al. Staging of Neurofibrillary Pathology in Alzheimer's Disease: A Study of the BrainNet Europe Consortium. *Brain Pathol*. 2008;18(4):484-496.
6. Attems J, Jellinger KA, Lintner F. Alzheimer's disease pathology influences severity and topographical distribution of cerebral amyloid angiopathy. *Acta Neuropathol*. 2005;110(3):222-231.

**Supplementary Fig. 2 – Unthresholded partial correlations matrix**

**Supplementary Fig.3 – Partial correlations matrix with IFDR threshold = 0.01**

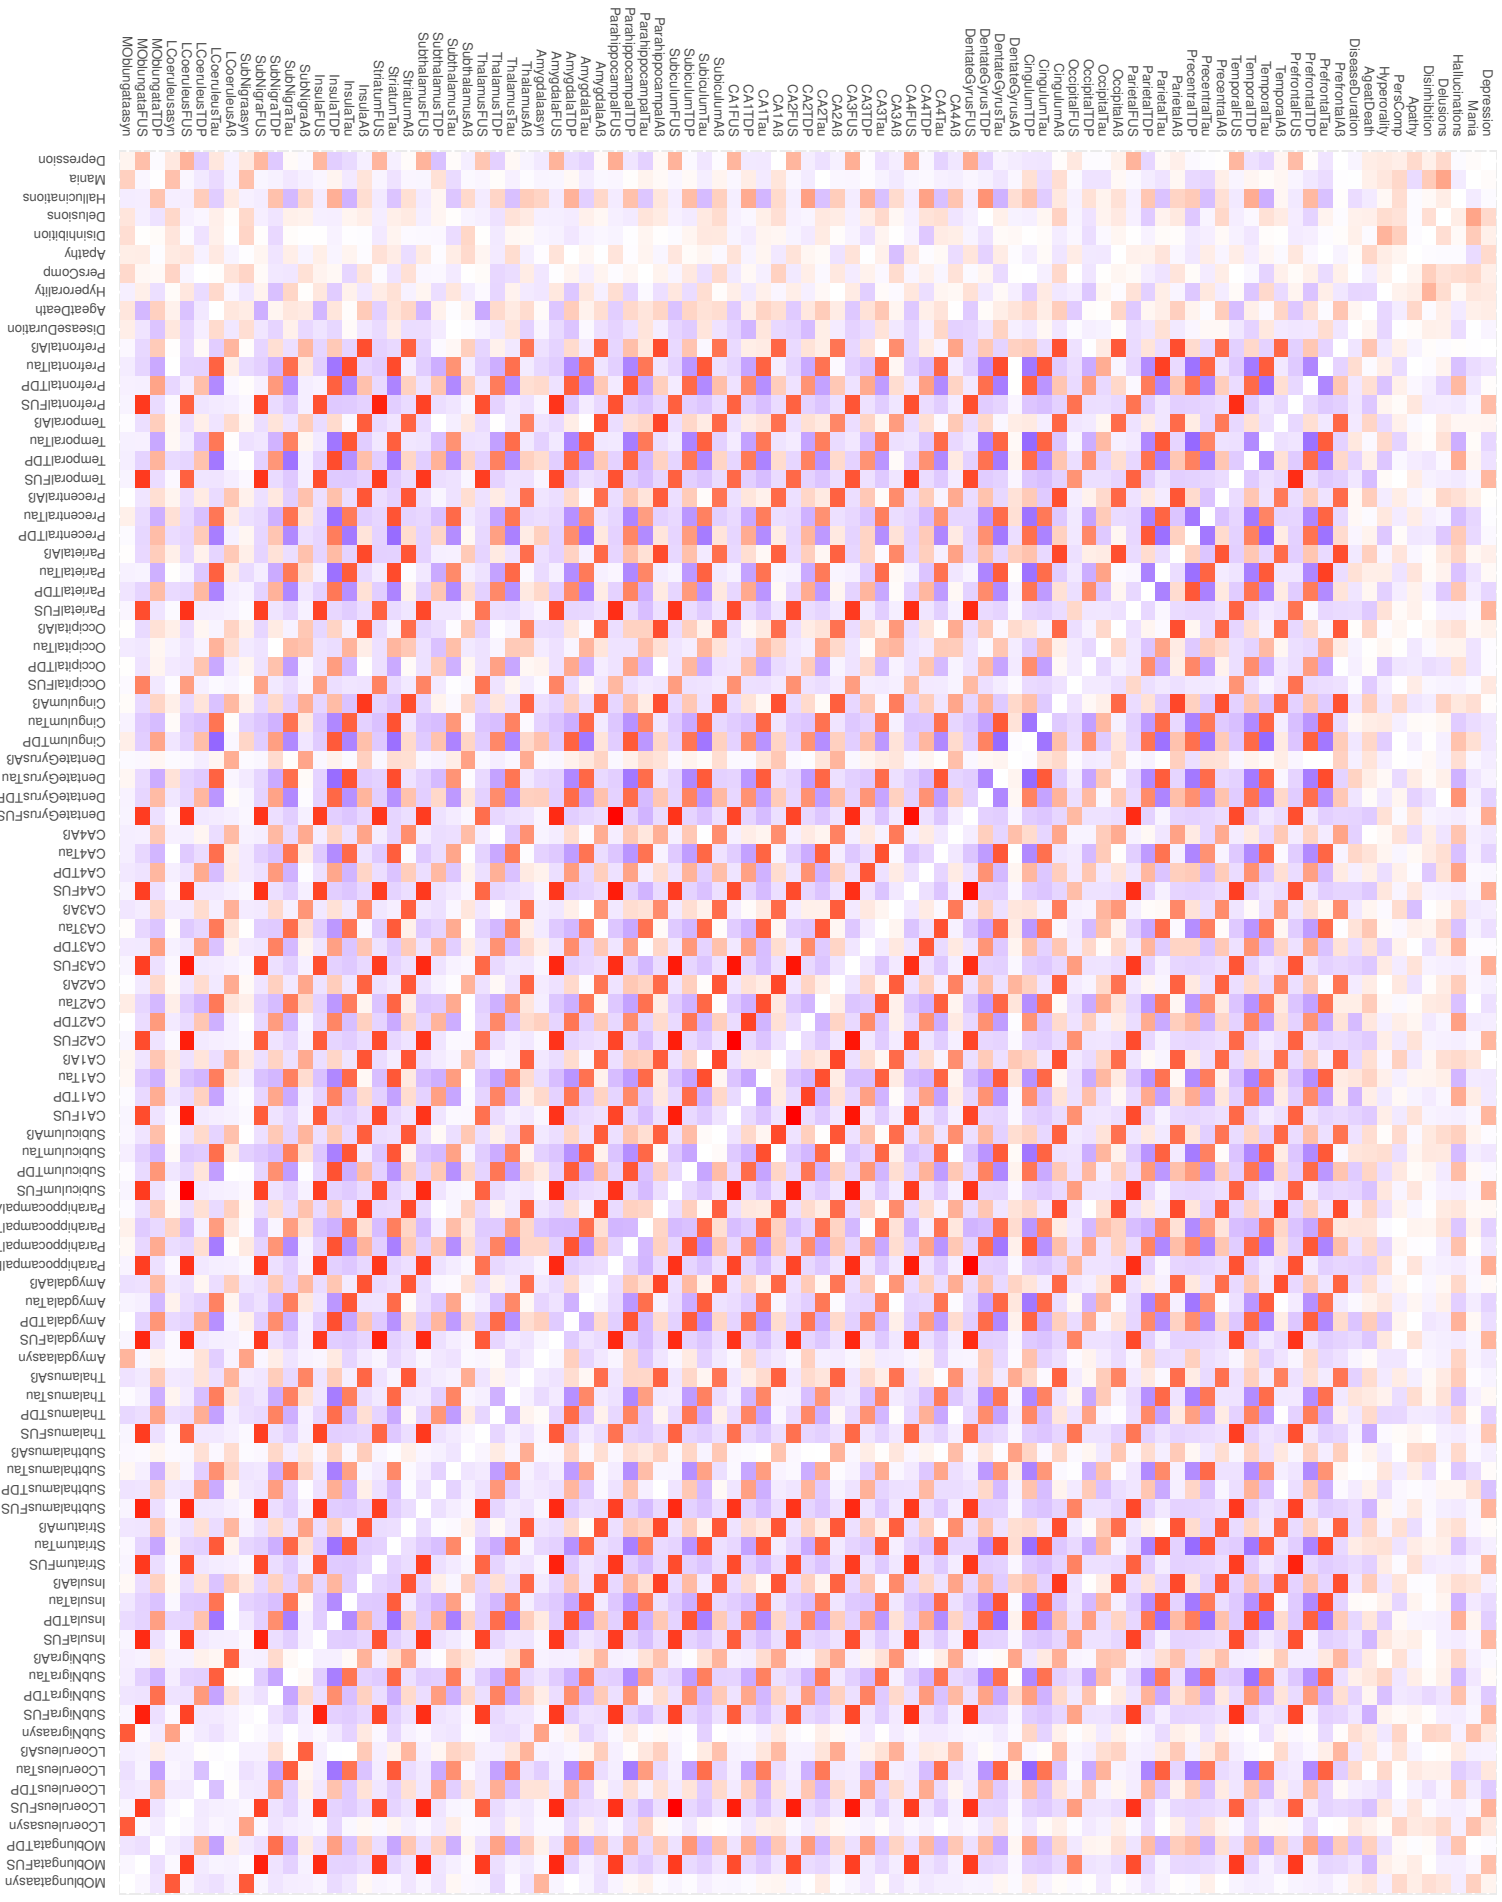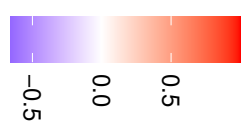





**Supplementary Table 1A - Correlations between regional cumulative pathology burden and psychiatric symptoms in FTLD donors (n = 87)**

| <b>Regional cumulative pathology burden<sup>a</sup></b> | <b>Depression</b> | <b>Mania</b>   | <b>Hallucinations</b> | <b>Delusions</b> |
|---------------------------------------------------------|-------------------|----------------|-----------------------|------------------|
| Prefrontal                                              | 0.104 (0.336)     | -0.204 (0.058) | -0.004 (0.969)        | -0.144 (0.183)   |
| Temporal                                                | -0.073 (0.503)    | 0.029 (0.791)  | 0.073 (0.503)         | 0.125 (0.247)    |
| Precentral                                              | 0.031 (0.773)     | -0.164 (0.128) | 0.093 (0.392)         | -0.033 (0.760)   |
| Parietal                                                | 0.021 (0.849)     | -0.091 (0.402) | 0.133 (0.220)         | 0.031 (0.774)    |
| Occipital                                               | 0.091 (0.403)     | -0.067 (0.536) | 0.174 (0.106)         | 0.072 (0.510)    |
| Cingulum                                                | -0.002 (0.983)    | 0.001 (0.992)  | 0.047 (0.665)         | 0.139 (0.200)    |
| Dentate gyrus                                           | 0.025 (0.819)     | -0.194 (0.072) | 0.120 (0.268)         | 0.058 (0.596)    |
| CA4                                                     | -0.109 (0.314)    | -0.090 (0.410) | 0.098 (0.368)         | 0.201 (0.062)    |
| CA3                                                     | -0.37 (0.737)     | -0.087 (0.424) | 0.051 (0.639)         | 0.221 (0.040)    |
| CA2                                                     | -0.020 (0.852)    | -0.070 (0.522) | 0.187 (0.083)         | 0.154 (0.155)    |
| CA1                                                     | 0.006 (0.957)     | 0.082 (0.448)  | 0.100 (0.359)         | 0.171 (0.114)    |
| Subiculum                                               | -0.010 (0.928)    | 0.007 (0.951)  | 0.051 (0.641)         | 0.171 (0.112)    |
| Parahippocampal                                         | -0.079 (0.468)    | 0.091 (0.400)  | 0.031 (0.776)         | 0.110 (0.312)    |
| Amygdala                                                | -0.107 (0.323)    | -0.026 (0.813) | 0.081 (0.454)         | 0.033 (0.760)    |
| Thalamus                                                | -0.103 (0.343)    | -0.032 (0.769) | -0.073 (0.503)        | -0.023 (0.834)   |
| Subthalamus                                             | 0.032 (0.769)     | -0.084 (0.439) | -0.271 (0.011)        | -0.010 (0.929)   |
| Striatum                                                | -0.001 (0.992)    | -0.076 (0.483) | 0.066 (0.541)         | 0.120 (0.268)    |
| Insula                                                  | -0.222 (0.038)    | 0.027 (0.805)  | 0.126 (0.245)         | 0.053 (0.626)    |
| Substantia nigra                                        | -0.002 (0.983)    | -0.168 (0.120) | -0.006 (0.953)        | 0.015 (0.892)    |
| Locus coeruleus                                         | 0.147 (0.174)     | -0.194 (0.072) | -0.124 (0.251)        | 0.048 (0.658)    |
| Medulla oblongata                                       | 0.147 (0.175)     | -0.052 (0.630) | -0.111 (0.307)        | 0.078 (0.470)    |

<sup>a</sup>Regional cumulative pathology score is the sum of TDP-43, tau, amyloid-beta and alpha-synuclein regional scores. Values in the table indicate Spearman's correlation coefficient (uncorrected *P*-value).

**Supplementary Table 1B - Correlations between regional cumulative pathology burden and behavioural symptoms in FTLD donors (n = 87)**

| <b>Regional cumulative pathology burden<sup>a</sup></b> | <b>Disinhibition</b> | <b>Apathy</b>  | <b>Pers/comp</b> | <b>Hyperorality</b> |
|---------------------------------------------------------|----------------------|----------------|------------------|---------------------|
| Prefrontal                                              | -0.082 (0.449)       | -0.003 (0.981) | -0.162 (0.135)   | 0.018 (0.378)       |
| Temporal                                                | -0.083 (0.442)       | -0.046 (0.670) | -0.172 (0.111)   | -0.145 (0.180)      |
| Precentral                                              | -0.041 (0.705)       | 0.001 (0.990)  | -0.016 (0.886)   | -0.059 (0.585)      |
| Parietal                                                | 0.014 (0.898)        | 0.185 (0.087)  | -0.015 (0.888)   | -0.110 (0.312)      |
| Occipital                                               | -0.033 (0.759)       | -0.040 (0.710) | 0.020 (0.853)    | -0.116 (0.283)      |
| Cingulum                                                | 0.025 (0.816)        | 0.056 (0.605)  | 0.002 (0.988)    | 0.018 (0.868)       |
| Dentate gyrus                                           | -0.109 (0.314)       | 0.047 (0.665)  | -0.126 (0.245)   | -0.050 (0.644)      |
| CA4                                                     | -0.061 (0.573)       | 0.032 (0.769)  | 0.047 (0.665)    | -0.011 (0.917)      |
| CA3                                                     | -0.087 (0.426)       | 0.049 (0.655)  | 0.027 (0.802)    | -0.099 (0.360)      |
| CA2                                                     | 0.033 (0.762)        | 0.076 (0.486)  | 0.064 (0.559)    | -0.033 (0.762)      |
| CA1                                                     | 0.060 (0.581)        | 0.004 (0.972)  | 0.079 (0.465)    | -0.020 (0.856)      |
| Subiculum                                               | 0.163 (0.131)        | 0.072 (0.510)  | 0.015 (0.890)    | 0.086 (0.426)       |
| Parahippocampal                                         | 0.026 (0.808)        | 0.017 (0.875)  | -0.002 (0.987)   | -0.211 (0.050)      |
| Amygdala                                                | -0.127 (0.241)       | 0.075 (0.492)  | 0.003 (0.981)    | -0.117 (0.280)      |
| Thalamus                                                | -0.057 (0.602)       | 0.043 (0.694)  | -0.246 (0.022)   | -0.057 (0.599)      |
| Subthalamus                                             | -0.127 (0.240)       | 0.132 (0.223)  | -0.127 (0.240)   | 0.114 (0.294)       |
| Striatum                                                | 0.026 (0.808)        | -0.082 (0.452) | 0.060 (0.583)    | 0.032 (0.767)       |
| Insula                                                  | -0.083 (0.443)       | -0.008 (0.940) | -0.038 (0.725)   | -0.108 (0.319)      |
| Substantia nigra                                        | -0.083 (0.444)       | -0.018 (0.868) | -0.140 (0.196)   | 0.114 (0.292)       |
| Locus coeruleus                                         | 0.007 (0.947)        | 0.080 (0.462)  | 0.023 (0.835)    | 0.201 (0.061)       |
| Medulla oblongata                                       | -0.017 (0.873)       | 0.133 (0.220)  | -0.035 (0.749)   | 0.190 (0.079)       |

<sup>a</sup>Regional cumulative pathology score is the sum of TDP-43, tau, amyloid-beta and alpha-synuclein regional scores. Values in the table indicate Spearman's correlation coefficient (uncorrected *P*-value).

**Supplementary Table 2 - Comparison of regional TDP-43 burden in FTL D-TDP donors between *C9orf72* carriers (n = 15) and non-carriers (n = 31)**

| <b>Regional TDP-43 pathology burden</b> | <b>P-value<sup>a</sup></b> |
|-----------------------------------------|----------------------------|
| Prefrontal                              | 0.018                      |
| Temporal                                | 0.226                      |
| Precentral                              | 0.093                      |
| Parietal                                | 0.97                       |
| Occipital                               | 0.24                       |
| Cingulum                                | 0.017                      |
| Dentate gyrus                           | 0.324                      |
| CA4                                     | 0.252                      |
| CA3                                     | 0.324                      |
| CA2                                     | 0.446                      |
| CA1                                     | 0.374                      |
| Subiculum                               | 0.568                      |
| Parahippocampal                         | 0.141                      |
| Amygdala                                | 0.826                      |
| Thalamus                                | 0.343                      |
| Subthalamus                             | 0.339                      |
| Striatum                                | 0.24                       |
| Insula                                  | 0.255                      |
| Substantia nigra                        | 0.506                      |
| Locus coeruleus                         | 0.326                      |
| Medulla oblongata                       | 0.65                       |

<sup>a</sup>P-values in the table refer to Mann-Whitney U tests, uncorrected for multiple comparisons

**Supplementary Table 3 – Frequency of psychiatric symptoms in FTLD-TDP brain donors with (n = 14) and without (n = 32) hippocampal sclerosis**

|                | <b>Hippocampal sclerosis present</b> | <b>Hippocampal sclerosis absent</b> | <b>P-value<sup>a</sup></b> |
|----------------|--------------------------------------|-------------------------------------|----------------------------|
| Depression     | 1/14 (7.1%)                          | 5/32 (15.6%)                        | 0.65                       |
| Mania          | 1/14 (7.1%)                          | 2/32 (6.3%)                         | 1.0                        |
| Hallucinations | 3/14 (21.4%)                         | 8/32 (25%)                          | 1.0                        |
| Delusions      | 2/14 (14.3%)                         | 2/32 (6.3%)                         | 0.57                       |

<sup>a</sup>P-values refer to Pearson's chi-squared tests, uncorrected for multiple comparisons

**Supplementary Table 4 - Comparison of regional TDP-43 burden in FTLD-TDP donors with (n = 14) and without (n = 32) hippocampal sclerosis**

| <b>Regional TDP-43 pathology burden</b> | <b>P-value<sup>a</sup></b> |
|-----------------------------------------|----------------------------|
| Prefrontal                              | 0.727                      |
| Temporal                                | 0.763                      |
| Precentral                              | 0.104                      |
| Parietal                                | 0.664                      |
| Occipital                               | 0.782                      |
| Cingulum                                | 0.592                      |
| Dentate gyrus                           | 0.788                      |
| CA4                                     | 0.219                      |
| CA3                                     | 0.530                      |
| CA2                                     | 0.596                      |
| CA1                                     | 0.816                      |
| Subiculum                               | 0.837                      |
| Parahippocampal                         | 0.901                      |
| Amygdala                                | 0.439                      |
| Thalamus                                | 0.916                      |
| Subthalamus                             | 0.070                      |
| Striatum                                | 0.059                      |
| Insula                                  | 0.626                      |
| Substantia nigra                        | 0.730                      |
| Locus coeruleus                         | 0.738                      |
| Medulla oblongata                       | 0.901                      |

<sup>a</sup>P-values in the table refer to Mann-Whitney U tests, uncorrected for multiple comparisons
